# Supplementary material
Source: ML conference proceedings conference paper supplement (https://proceedings.mlr.press/v84/jiang18a.html)
Supplement: Supplementary file [file jiang18a-supp.pdf]

**Appendix to “Approximate Bayesian Computation  
with Kullback-Leibler Divergence as Data Discrepancy”**

1  
2

3 **1 Technical Proof**

4 **1.1 Lévy’s Upward Theorem**

5 **Theorem 0 (Lévy’s Upward Theorem)** Denote by  $\{Z_n\}_{n \geq 0}$  a collection of random variables, and  
6 by  $\mathcal{F}_n$  a filtration on the same probability space. If  $\sup_{n \geq 0} |Z_n|$  is integrable,  $Z_n \rightarrow Z_\infty$  almost  
7 surely as  $n \rightarrow \infty$  and  $\mathcal{F}_n \uparrow \mathcal{F}_\infty$  then  $\mathbb{E}[Z_n | \mathcal{F}_n] \rightarrow \mathbb{E}[Z_\infty | \mathcal{F}_\infty]$  both almost surely and in mean.

8 **1.2 Proof of Theorem 1**

Let  $Z_n = \mathbb{I}(\mathcal{D}(\mathbf{X}, \mathbf{Y}) < \epsilon) = \mathbb{I}(\mathcal{D}(\{X_i\}_{i=1}^n, \{Y_i\}_{i=1}^{m(n)}) < \epsilon)$  then  $\sup_{n \rightarrow \infty} |Z_n| \geq 1$  and  $Z_n \rightarrow$   
 $Z_\infty = \mathbb{I}(\mathcal{D}(p_{\theta^*}, p_\theta) < \epsilon)$ . Let  $\mathcal{F}_n = \sigma\text{-algebra}(X_1, \dots, X_n)$  then  $\mathcal{F}_n \uparrow \mathcal{F}_\infty = \cup_{k \geq 0} \mathcal{F}_k$ . Using  
Lévy’s Upward Theorem yields

$$\mathbb{E}_\theta [\mathbb{I}(\mathcal{D}(\mathbf{X}, \mathbf{Y}) < \epsilon) | \mathbf{X}] \rightarrow \mathbb{I}(\mathcal{D}(p_{\theta^*}, p_\theta) < \epsilon) \text{ a.s..}$$

Noting that

$$\mathbb{E}_\theta [\mathbb{I}(\mathcal{D}(\mathbf{X}, \mathbf{Y}) < \epsilon) | \mathbf{X}] = \int \mathbb{I}(\mathcal{D}(\mathbf{X}, \mathbf{y}) < \epsilon) p_\theta(\mathbf{y}) d\mathbf{y},$$

we have convergence of the numerator in (1)

$$\int \pi(\theta) \mathbb{I}(\mathcal{D}(\mathbf{X}, \mathbf{y}) < \epsilon) p_\theta(\mathbf{y}) d\mathbf{y} \rightarrow \pi(\theta) \mathbb{I}(\mathcal{D}(p_{\theta^*}, p_\theta) < \epsilon) \text{ a.s.,}$$

and convergence of the denominator in (1) by the dominated convergence theorem

$$\iint \pi(\theta') \mathbb{I}(\mathcal{D}(\mathbf{X}, \mathbf{y}) < \epsilon) p_{\theta'}(\mathbf{y}) d\mathbf{y} d\theta' \rightarrow \int \pi(\theta') \mathbb{I}(\mathcal{D}(p_{\theta^*}, p_{\theta'}) < \epsilon) d\theta'.$$

9 Combining two convergence results completes the proof.

10 **1.3 Proof of Corollary 1**

11 This is an immediate consequence of Theorem 1 in the main text and Theorem 2 in [? ].

12 **1.4 Proof of Corollary 2**

13 As  $n \rightarrow \infty$  and  $m/n \rightarrow \alpha > 0$ ,

$$\begin{aligned} \mathcal{D}_{\text{CA}}(\mathbf{X}, \mathbf{Y}) &\rightarrow \frac{1}{1+\alpha} \int [1-h(x)] p_{\theta^*}(x) dx + \frac{\alpha}{1+\alpha} \int h(y) p_\theta(y) dy \\ &= \frac{1}{1+\alpha} + \frac{1}{1+\alpha} \int h(x) [\alpha p_\theta(x) - p_{\theta^*}(x)] dx \end{aligned}$$

14 If  $h(x) = \mathbb{I}(\alpha p_\theta(x) \geq p_{\theta^*}(x))$ ,

$$\begin{aligned} \text{RHS} &= \frac{1}{1+\alpha} + \frac{1}{1+\alpha} \int \max \left\{ \frac{\alpha p_\theta(x)}{p_{\theta^*}(x)} - 1, 0 \right\} p_{\theta^*}(x) dx \\ &= \frac{1}{1+\alpha} \int \left[ 1 + \max \left\{ \frac{\alpha p_\theta(x)}{p_{\theta^*}(x)} - 1, 0 \right\} \right] p_{\theta^*}(x) dx \\ &= \frac{1}{1+\alpha} \int \max \left\{ \frac{\alpha p_\theta(x)}{p_{\theta^*}(x)}, 1 \right\} p_{\theta^*}(x) dx \\ &= \frac{1}{1+\alpha} \int \left[ \max \left\{ \frac{\alpha p_\theta(x)}{p_{\theta^*}(x)}, 1 \right\} - (\alpha \vee 1) \right] p_{\theta^*}(x) dx + \frac{\alpha \vee 1}{1+\alpha} \\ &= \mathcal{D}_f(p_{\theta^*} || p_\theta) + c(\alpha) \end{aligned}$$

15 **1.5 Proof of Corollary 3**

The auxiliary MLE asymptotically minimizes the KL divergence between  $p_\theta$  and  $p_A(\cdot|\phi)$ .

$$\hat{\phi}(\mathbf{Y}) = \arg \max_{\phi \in \Phi} \prod_{i=1}^m p_A(Y_i|\phi) \rightarrow \hat{\phi}(\theta) = \arg \min_{\phi \in \Phi} \text{KL}(p_\theta || p_A(\cdot|\phi))$$

Since the auxiliary model  $\{p_A(\cdot|\phi) : \phi \in \Phi\}$  is bijective to the model  $\{p_\theta : \theta \in \Theta\}$ ,

$$\min_{\phi \in \Phi} \text{KL}(p_\theta || p_A(\cdot|\phi)) = 0, \quad p_A(\cdot|\hat{\phi}(\theta)) = p_\theta.$$

Then

$$\mathfrak{D}_{\text{AL}}(\mathbf{X}, \mathbf{Y}) \rightarrow \text{KL}(p_\theta || p_A(\cdot|\hat{\phi}(\theta^*))) - \text{KL}(p_\theta || p_A(\cdot|\hat{\phi}(\theta))) = \text{KL}(p_\theta || p_{\theta^*}).$$

16
